# Supplementary material
Source: HighWire-hosted journal article supplement (https://cmaj.ca/highwire/filestream/81281/field_highwire_adjunct_files/7/211881-res-8-at.pdf)
Supplement: 211881-res-8-at.pdf [file 211881-res-8-at.pdf]

**Supplementary Appendix 8:** Bootstrapping differences in SARS-CoV-2 anti-spike and anti-RBD relative ratios following BNT162b2 or mRNA-1273 vaccination at 6-7 weeks and 12 weeks after second dose

| Antibody   | Weeks after second dose | No. of patients |           | Relative ratio, (95% CI) |                  | Difference in relative ratio, median (95% CI) |
|------------|-------------------------|-----------------|-----------|--------------------------|------------------|-----------------------------------------------|
|            |                         | BNT162b2        | mRNA-1273 | BNT162b2                 | mRNA-1273        |                                               |
| Anti-spike | 6-7 weeks               | 70              | 87        | 1.58 (1.47-1.61)         | 1.72 (1.71-1.76) | 0.14 (0.10-0.24)                              |
|            | 12 weeks                | 122             | 71        | 1.45 (1.36-1.51)         | 1.93 (1.88-1.97) | 0.47(0.39-0.57)                               |
| Anti-RBD   | 6-7 weeks               | 70              | 87        | 1.23 (0.97-1.39)         | 1.44 (1.37-1.48) | 0.21 (0.00-0.48)                              |
|            | 12 weeks                | 122             | 71        | 0.89 (0.75-1.11)         | 1.32 (1.26-1.38) | 0.43 (0.15-0.58)                              |

Note: CI=confidence interval, RBD=receptor binding domain.

Note: Bootstrapping (random case sampling with replacement with 5000 replications) was used to generate 95% confidence intervals for the median difference in anti-spike and anti-RBD levels (mRNA-1273 minus BNT162b2) relative ratios at both 6-7 and 12 weeks.
